# Supplementary material
Source: PubMed Central journal article supplement (PMC8335746)
Supplement: NIHMS1690874-supplement-1690874_SuppInfo.pdf [file NIHMS1690874-supplement-1690874_SuppInfo.pdf]

---

**Supplementary information**

---

**Beyond the storm – subacute toxicities and late effects in children receiving CAR T cells**

---

In the format provided by the authors and unedited

| <b>Supplementary Table 1   Proposed neuropsychological evaluation to assess acute and late cognitive effects of CAR T cell therapy</b> |                                                      |                             |               |                            |                         |                          |                          |                          |
|----------------------------------------------------------------------------------------------------------------------------------------|------------------------------------------------------|-----------------------------|---------------|----------------------------|-------------------------|--------------------------|--------------------------|--------------------------|
| <b>Domains</b>                                                                                                                         | <b>Proposed measures<sup>a</sup></b>                 | <b>Baseline<sup>b</sup></b> | <b>7–14 d</b> | <b>21–28 d<sup>c</sup></b> | <b>3 mo<sup>b</sup></b> | <b>12 mo<sup>c</sup></b> | <b>24 mo<sup>c</sup></b> | <b>36 mo<sup>c</sup></b> |
| <b>CAR T-cell neurotoxicity</b>                                                                                                        | ICANS score                                          | ✓                           | ✓             | ✓                          | ✓                       | ✓                        | ✓                        | ✓                        |
| <b>Processing speed</b>                                                                                                                | Cogstate detection                                   | ✓                           |               | ✓                          | ✓                       | ✓                        | ✓                        | ✓                        |
| <b>Attention</b>                                                                                                                       | Cogstate identification                              | ✓                           |               | ✓                          | ✓                       | ✓                        | ✓                        | ✓                        |
| <b>Learning and memory</b>                                                                                                             | Cogstate One Card Learning                           | ✓                           |               | ✓                          | ✓                       | ✓                        | ✓                        | ✓                        |
| <b>Working memory</b>                                                                                                                  | Cogstate One-Back                                    | ✓                           |               | ✓                          | ✓                       | ✓                        | ✓                        | ✓                        |
|                                                                                                                                        | Wechsler Digit Span: Forward/Backward                |                             |               | ✓                          |                         | ✓                        | ✓                        | ✓                        |
| <b>Executive function/cognitive flexibility</b>                                                                                        | Cogstate Groton Maze learning test                   | ✓                           |               | ✓                          | ✓                       | ✓                        | ✓                        | ✓                        |
| <b>Verbal fluency</b>                                                                                                                  | Verbal Fluency (standard form: F-A-S)                |                             |               | ✓                          |                         |                          | ✓                        |                          |
|                                                                                                                                        | Verbal Fluency (alternate form: B-H-R)               |                             |               |                            |                         | ✓                        |                          | ✓                        |
| <b>Oral and graphomotor processing speed</b>                                                                                           | Symbol Digit Modalities test                         |                             |               | ✓                          |                         | ✓                        | ✓                        | ✓                        |
| <b>Estimated intellectual functioning</b>                                                                                              | WASI-II vocabulary/matrix reasoning (estimated IQ)   |                             |               | ✓                          |                         | ✓                        | ✓                        | ✓                        |
| <b>Academic screening</b>                                                                                                              | Woodcock Johnson-IV (reading/calculation)            |                             |               | ✓                          |                         | ✓                        | ✓                        | ✓                        |
| <b>Patient and parent reported outcome measures</b>                                                                                    | Background/history and update form                   | ✓                           |               | ✓                          |                         | ✓                        | ✓                        | ✓                        |
|                                                                                                                                        | NCI neuro-symptom checklist parent report            | ✓                           | ✓             | ✓                          | ✓                       | ✓                        | ✓                        | ✓                        |
|                                                                                                                                        | PROMIS CAT self and parent report (selected domains) | ✓                           |               | ✓                          | ✓                       | ✓                        | ✓                        | ✓                        |
|                                                                                                                                        | Vineland-3 CAT parent report                         |                             |               | ✓                          |                         | ✓                        | ✓                        | ✓                        |
|                                                                                                                                        | BRIEF-2 parent report                                |                             |               | ✓                          |                         | ✓                        | ✓                        | ✓                        |

<sup>a</sup>Proposed outcome measures to assess the recommended domains in CAR T-cell trials at this time; comparable measures evaluating these domains may be used or additional domains may be assessed if needed.

<sup>b</sup>Core battery: shorter assessment of a core set of domains deemed most important for investigators to assess consistently across CAR T-cell trials using the proposed or similar measures to monitor acute and late effects of CAR T-cell therapies (35–45 minutes).

<sup>c</sup>Comprehensive battery: longer assessment (includes the core battery) to evaluate other domains of functioning that may be affected by neurotoxicity; the domains/measures listed in the comprehensive battery can be modified or expanded by investigators to explore potential late effects on other areas of functioning (75–90 minutes).

BRIEF, Behavioral Rating Inventory of Executive Function; CAT, computer-adaptive tests; ICANS, immune effector cell-associated neurotoxicity syndrome; mo, months; NCI, National Cancer Institute (USA); PROMIS: Patient-Reported Outcomes Measurement Information System; WASI-II, Wechsler Abbreviated Scale Intelligence-2<sup>nd</sup> edition.

Test battery designed by the CAR T cell neurotoxicity working group: Jesse Bledsoe, Juliane Gust, Staci Martin, Haneen Shalabi, Agne Taraseviciute, Ashley Whitaker and Pam Wolters.
